# Supplementary material for: A Hazelnut-Enriched Diet Modulates Oxidative Stress and Inflammation Gene Expression without Weight Gain
Source: PubMed Central journal article supplement (PMC6637671; doi:10.1155/2019/4683723), 2019-07-04

Graphical Abstract

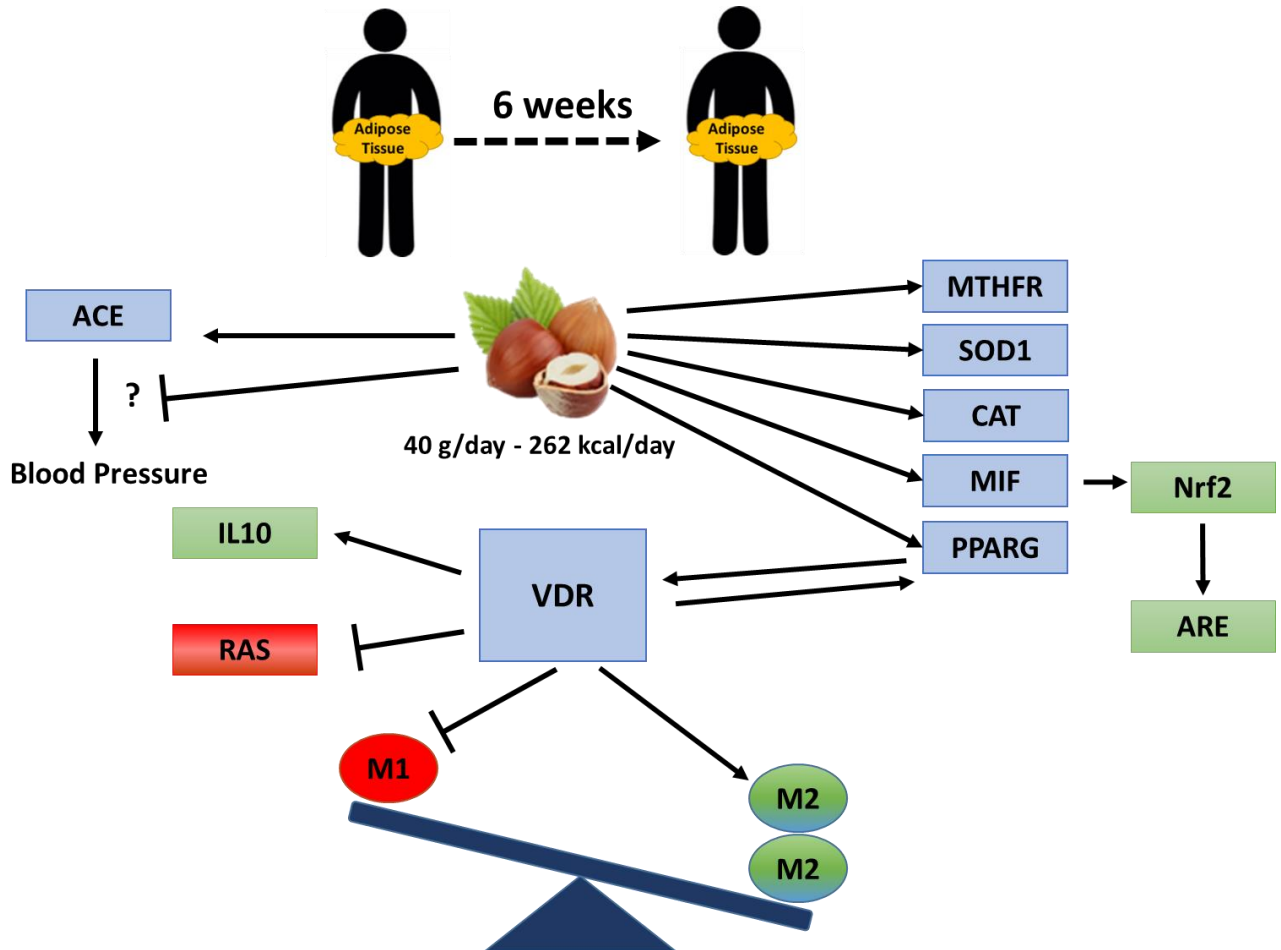

Supplement: 4683723.f1.pdf [file 4683723.f1.pdf]
